# Supplementary material
Source: Springer Nature journal article supplement (https://www.springermedizin.de/resource/supplementary/13054_2012_1681_MOESM3_ESM.pdf/9711250)

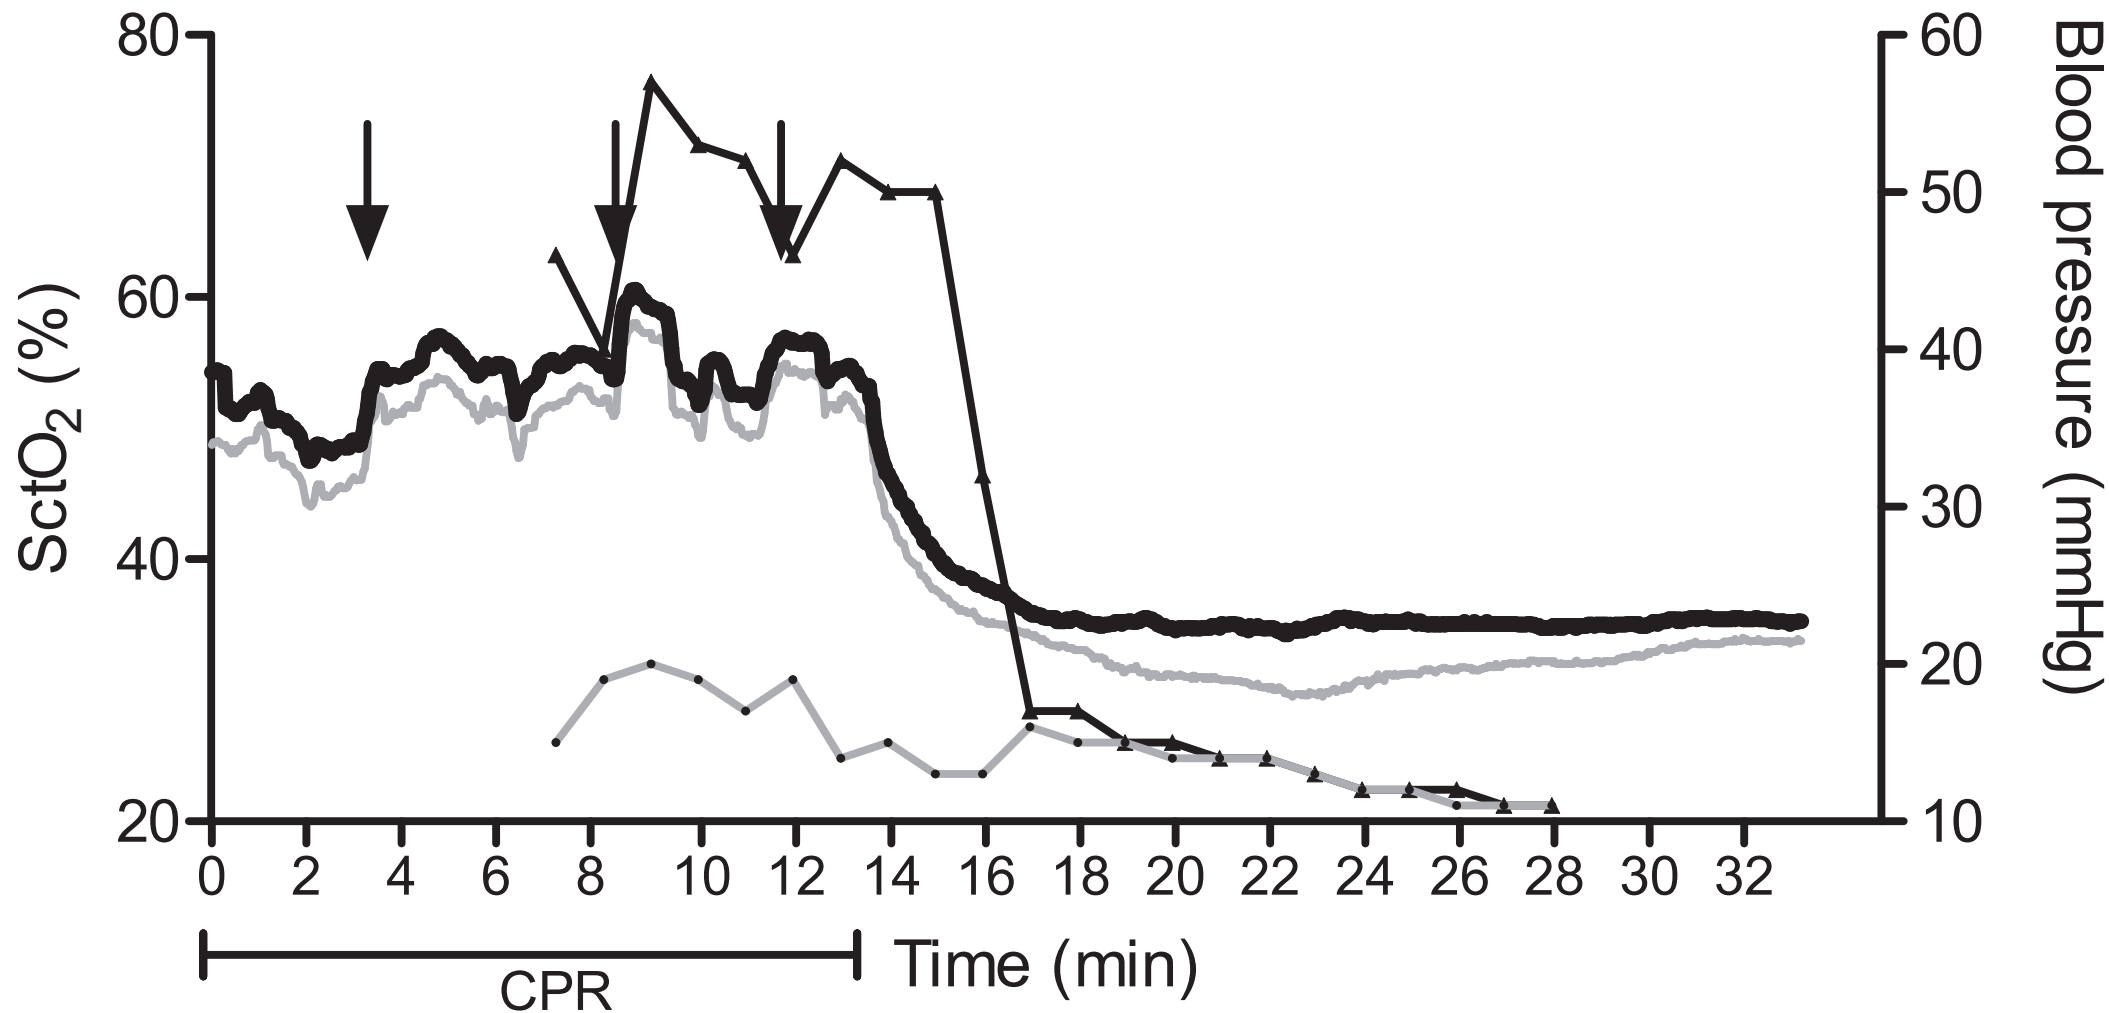

— SctO<sub>2</sub> left    — SctO<sub>2</sub> right    —▲— systolic BP    —●— diastolic BP  
 —▶— switch of person given CPR

Supplement: MOESM3 [file 9711250]
